# Supplementary material
Source: publisher site journal article supplement (https://www.e-cmh.org/upload/media/cmh-2023-0057-Supplementary-3.pdf)
Supplement: Supplementary file 1 [file cmh-2023-0057-Supplementary-3.pdf]

## SUPPLEMENTARY REFERENCES

1. Gaiani S, Gramantieri L, Venturoli N, Piscaglia F, Siringo S, D'Errico A, et al. What is the criterion for differentiating chronic hepatitis from compensated cirrhosis? A prospective study comparing ultrasonography and percutaneous liver biopsy. *J Hepatol* 1997;27:979-985.
2. Aubé C, Oberti F, Korali N, Namour MA, Loisel D, Tanguy JY, et al. Ultrasonographic diagnosis of hepatic fibrosis or cirrhosis. *J Hepatol* 1999;30:472-478.
3. Berzigotti A, Ashkenazi E, Reverter E, Abruñales JG, Bosch J. Non-invasive diagnostic and prognostic evaluation of liver cirrhosis and portal hypertension. *Dis Markers* 2011;31:129-138.
4. Ahn K, Kim J, Kim Y, Uh Y, Yoon KJ. FIB-4 score as a useful screening test for diagnosing liver fibrosis. *Lab Med Qual Assur* 2017;39:16-22.
5. Eichstaedt KE, Kovatch K, Maroof DA. A less conservative method to adjust for familywise error rate in neuropsychological research: the Holm's sequential Bonferroni procedure. *NeuroRehabilitation* 2013;32:693-696.
